# Supplementary material
Source: publisher site journal article supplement (https://www.spandidos-publications.com/4234/downloadSupplementary)
Supplement: Supplementary file 1 [file downloadSupplementary]

## Sheet: RA-vs-ND.limma_Dif
Table SI. All the differentially expressed genes between the RA groups and OA groups of samples amongst the three datasets.
row.names(tT)	log fold change	adjusted P-value	Change in expression
IGHM	4.99896	3.80203e-18	Up-Regulated
CXCL13	5.54645	2.31012e-14	Up-Regulated
ADAMDEC1	3.54676	3.95738e-14	Up-Regulated
SEL1L3	2.27953	4.43201e-14	Up-Regulated
POU2AF1	4.81943	4.43201e-14	Up-Regulated
PSMB9	1.54677	4.43201e-14	Up-Regulated
VOPP1	1.28104	2.25005e-13	Up-Regulated
CXCL10	3.04482	7.77803e-13	Up-Regulated
CD27	2.67658	1.47498e-12	Up-Regulated
TRBC1	2.54431	2.14984e-12	Up-Regulated
PLCG2	1.04773	2.38084e-12	Up-Regulated
TNFRSF17	4.45808	3.42402e-12	Up-Regulated
GUSBP11	2.32456	7.08788e-12	Up-Regulated
LRRC15	2.78885	9.78373e-12	Up-Regulated
HLA-DOB	2.90649	9.95671e-12	Up-Regulated
JCHAIN	5.23955	9.95671e-12	Up-Regulated
CXCL9	3.35482	1.03592e-11	Up-Regulated
IGKC	3.28825	2.06537e-11	Up-Regulated
SDC1	2.2456	2.06537e-11	Up-Regulated
STAT1	1.34916	2.06537e-11	Up-Regulated
UCP2	1.47476	3.57632e-11	Up-Regulated
CCL5	2.31247	3.84827e-11	Up-Regulated
DOCK10	1.97828	5.28155e-11	Up-Regulated
CRYBG1	1.01072	5.38798e-11	Up-Regulated
NKG7	3.77373	6.71877e-11	Up-Regulated
AIM2	2.64588	6.71877e-11	Up-Regulated
LGALS2	3.11259	7.0627e-11	Up-Regulated
LCK	2.668	7.0627e-11	Up-Regulated
BLNK	1.59125	7.94595e-11	Up-Regulated
CD247	2.11914	8.50944e-11	Up-Regulated
CCR5	2.16753	8.67233e-11	Up-Regulated
PTTG1	1.01098	8.67233e-11	Up-Regulated
IL15	1.31756	8.67233e-11	Up-Regulated
CD52	2.94842	1.07225e-10	Up-Regulated
IGLV1-40	3.59294	1.07225e-10	Up-Regulated
CD2	2.15231	1.12899e-10	Up-Regulated
CD79A	2.41792	1.42143e-10	Up-Regulated
IL32	3.02408	2.3325e-10	Up-Regulated
PLXNC1	2.18634	2.91066e-10	Up-Regulated
CD3D	2.39179	3.02799e-10	Up-Regulated
HLA-DMB	1.69246	3.35038e-10	Up-Regulated
IL2RG	2.01268	3.45207e-10	Up-Regulated
GBP1	1.70098	4.86675e-10	Up-Regulated
LCP1	1.37418	5.04444e-10	Up-Regulated
PIM2	1.65558	5.60101e-10	Up-Regulated
MXRA5	2.51539	6.62057e-10	Up-Regulated
TRAF3IP3	1.6639	6.62057e-10	Up-Regulated
ITGA4	1.81075	8.37166e-10	Up-Regulated
ITGB2	1.29782	1.03537e-09	Up-Regulated
PTPRCAP	2.6466	1.34349e-09	Up-Regulated
OSBPL3	1.46484	1.37321e-09	Up-Regulated
IGHD	3.68245	1.46437e-09	Up-Regulated
ENTPD1	1.04106	1.54062e-09	Up-Regulated
CYFIP2	1.29931	1.92518e-09	Up-Regulated
CCL18	2.86511	2.01837e-09	Up-Regulated
GZMA	1.90548	2.12297e-09	Up-Regulated
CD8A	1.76891	2.55692e-09	Up-Regulated
ATP2A3	1.67115	2.61591e-09	Up-Regulated
TRAC	2.32318	3.01726e-09	Up-Regulated
CXCL11	2.27472	3.22841e-09	Up-Regulated
TAP1	1.20652	3.27515e-09	Up-Regulated
BTN3A3	1.45584	3.69268e-09	Up-Regulated
LAMP3	2.9973	4.39878e-09	Up-Regulated
TNFSF10	1.16695	4.40245e-09	Up-Regulated
CD48	1.71129	5.64832e-09	Up-Regulated
NMI	1.24202	6.09646e-09	Up-Regulated
RAC2	1.78353	6.20036e-09	Up-Regulated
APOBEC3G	1.23814	6.20036e-09	Up-Regulated
ALOX5	1.27335	6.20036e-09	Up-Regulated
TPD52	1.65933	6.64974e-09	Up-Regulated
PSMB8	1.096	6.91329e-09	Up-Regulated
LEF1	1.71475	8.2191e-09	Up-Regulated
LTA4H	1.2581	9.4638e-09	Up-Regulated
HLA-DMA	1.25193	1.02414e-08	Up-Regulated
PTPN7	1.45424	1.08262e-08	Up-Regulated
GZMH	2.29405	1.16037e-08	Up-Regulated
GZMK	2.31989	1.24209e-08	Up-Regulated
PTPRC	1.65638	1.29186e-08	Up-Regulated
PLAAT4	1.42608	1.3532e-08	Up-Regulated
ST6GAL1	1.19163	1.3532e-08	Up-Regulated
IL10RA	1.01566	1.54631e-08	Up-Regulated
NCKAP1L	1.09864	1.57512e-08	Up-Regulated
GZMB	2.56132	1.78303e-08	Up-Regulated
CORO1A	1.94055	1.98779e-08	Up-Regulated
FLRT2	1.64536	2.17463e-08	Up-Regulated
IL7R	1.94359	2.17463e-08	Up-Regulated
CCR2	1.34754	2.17642e-08	Up-Regulated
SP140	1.2201	2.24367e-08	Up-Regulated
NFE2L3	1.25853	2.45019e-08	Up-Regulated
TOP2A	1.93733	2.58399e-08	Up-Regulated
RTN1	1.28703	2.62136e-08	Up-Regulated
TYMS	1.32235	2.96496e-08	Up-Regulated
PRKCB	1.27732	3.09147e-08	Up-Regulated
HLA-DQB1	1.60702	3.27591e-08	Up-Regulated
PSMB10	1.05261	3.43336e-08	Up-Regulated
IGHG1	1.5833	3.57076e-08	Up-Regulated
LPXN	1.01188	3.83801e-08	Up-Regulated
FCMR	1.87326	4.05575e-08	Up-Regulated
RHOH	2.15762	4.23966e-08	Up-Regulated
WNT5A	1.30068	4.44228e-08	Up-Regulated
LRMP	1.78374	4.45337e-08	Up-Regulated
LY75	1.10651	4.48667e-08	Up-Regulated
ARHGAP25	1.27686	4.7369e-08	Up-Regulated
CD86	1.27607	4.91007e-08	Up-Regulated
FCGR2B	1.42215	7.07241e-08	Up-Regulated
MSX2	1.09086	7.30827e-08	Up-Regulated
ITK	1.58057	7.89951e-08	Up-Regulated
ADAM28	1.99632	8.75426e-08	Up-Regulated
MMP1	4.42595	1.05835e-07	Up-Regulated
CSF2RB	1.25003	1.14384e-07	Up-Regulated
ISG20	1.47656	1.1668e-07	Up-Regulated
CTSC	1.08764	1.1668e-07	Up-Regulated
SYK	1.30798	1.16687e-07	Up-Regulated
SMPDL3A	1.29564	1.21116e-07	Up-Regulated
TNFSF11	1.78063	1.22779e-07	Up-Regulated
RUNX3	1.1077	1.24403e-07	Up-Regulated
IRF4	1.2158	1.38808e-07	Up-Regulated
ADCY7	1.14789	1.52821e-07	Up-Regulated
GAP43	1.3781	1.54959e-07	Up-Regulated
SEMA4D	1.95606	1.66661e-07	Up-Regulated
LST1	1.29388	1.7044e-07	Up-Regulated
CYBA	1.07238	1.74783e-07	Up-Regulated
MS4A1	2.24566	1.86142e-07	Up-Regulated
CD72	1.90651	1.98396e-07	Up-Regulated
GGH	1.07542	2.03199e-07	Up-Regulated
NDC80	2.32794	2.09513e-07	Up-Regulated
DAZL	1.62712	2.27084e-07	Up-Regulated
RRM2	1.28819	2.43189e-07	Up-Regulated
BIRC3	1.23245	2.43727e-07	Up-Regulated
CLEC10A	1.00244	2.67802e-07	Up-Regulated
RASGRP1	2.46315	2.77722e-07	Up-Regulated
SPOCK2	1.04177	2.79455e-07	Up-Regulated
BTN3A2	1.36543	2.8248e-07	Up-Regulated
IFI27	1.11181	2.9904e-07	Up-Regulated
ICAM3	1.42757	3.06642e-07	Up-Regulated
KIF11	1.75771	3.1126e-07	Up-Regulated
JAK2	1.02388	3.21055e-07	Up-Regulated
SLC39A8	1.38594	3.53125e-07	Up-Regulated
CD19	1.71726	3.65761e-07	Up-Regulated
ITGAL	1.64387	3.91775e-07	Up-Regulated
DOCK2	1.16362	4.45863e-07	Up-Regulated
CD38	1.94478	4.6649e-07	Up-Regulated
EVI2B	1.11147	5.35037e-07	Up-Regulated
HCP5	1.32532	5.37003e-07	Up-Regulated
FRMD4B	1.00926	5.77268e-07	Up-Regulated
VAMP8	1.0983	5.87829e-07	Up-Regulated
SLAMF1	1.54098	5.88193e-07	Up-Regulated
LOXL2	1.1534	6.7974e-07	Up-Regulated
CD14	1.06528	8.96361e-07	Up-Regulated
CRTAM	1.79568	9.65695e-07	Up-Regulated
MOXD1	1.04971	9.8464e-07	Up-Regulated
FAP	1.66646	9.94106e-07	Up-Regulated
CYTIP	1.44775	1.00193e-06	Up-Regulated
IDO1	1.22241	1.00895e-06	Up-Regulated
HLA-DPB1	1.00489	1.01898e-06	Up-Regulated
CD3E	1.06854	1.02358e-06	Up-Regulated
LILRB2	1.57968	1.03575e-06	Up-Regulated
AQP9	2.53206	1.08588e-06	Up-Regulated
FZD2	1.41613	1.16171e-06	Up-Regulated
SIT1	1.46056	1.16171e-06	Up-Regulated
CDC20	1.84594	1.2549e-06	Up-Regulated
GFRA2	1.53022	1.26594e-06	Up-Regulated
P2RY6	1.04531	1.26594e-06	Up-Regulated
CST7	1.49856	1.28279e-06	Up-Regulated
MAP4K1	1.24449	1.32371e-06	Up-Regulated
CD37	1.56695	1.324e-06	Up-Regulated
PRF1	1.29002	1.35991e-06	Up-Regulated
P2RX5	2.17392	1.38727e-06	Up-Regulated
CCR7	1.48879	1.3874e-06	Up-Regulated
PNOC	1.76342	1.40531e-06	Up-Regulated
AIF1	1.19099	1.44604e-06	Up-Regulated
NRGN	1.59806	1.58766e-06	Up-Regulated
LILRB4	1.10608	1.58928e-06	Up-Regulated
ST8SIA1	1.67775	1.65769e-06	Up-Regulated
SH2D1A	1.28161	1.85975e-06	Up-Regulated
CDH11	1.04919	1.9787e-06	Up-Regulated
PPP1R16B	1.78932	2.47056e-06	Up-Regulated
CCL13	1.61746	3.03906e-06	Up-Regulated
SELPLG	1.02786	3.06434e-06	Up-Regulated
ZAP70	1.46481	3.43561e-06	Up-Regulated
KCNN4	1.15839	3.60203e-06	Up-Regulated
TPX2	1.29766	3.88169e-06	Up-Regulated
KLRB1	1.90101	4.19429e-06	Up-Regulated
CTSS	1.04397	4.65418e-06	Up-Regulated
LILRB3	1.326	4.71537e-06	Up-Regulated
PASK	1.03328	4.8069e-06	Up-Regulated
DLGAP5	1.45104	4.9008e-06	Up-Regulated
CXCR6	1.0406	4.92577e-06	Up-Regulated
FAM30A	1.45784	5.09342e-06	Up-Regulated
PLEK	1.03161	5.10874e-06	Up-Regulated
NUP210	1.21291	6.00682e-06	Up-Regulated
IL7	1.00645	6.035e-06	Up-Regulated
MATK	1.41603	6.05956e-06	Up-Regulated
ITGB7	1.62732	6.46518e-06	Up-Regulated
NID2	1.28477	6.62285e-06	Up-Regulated
THY1	1.29013	6.73252e-06	Up-Regulated
CXCL6	2.03346	6.73252e-06	Up-Regulated
ARHGAP45	1.02277	7.27138e-06	Up-Regulated
CAPG	1.11949	7.80882e-06	Up-Regulated
APOBEC3B	1.14628	8.12181e-06	Up-Regulated
ACAP1	1.27119	8.13598e-06	Up-Regulated
COL1A1	1.74503	8.30309e-06	Up-Regulated
CHN1	1.11297	1.00569e-05	Up-Regulated
CXCR4	1.00539	1.02004e-05	Up-Regulated
LOXL1	1.47611	1.04094e-05	Up-Regulated
HK3	1.70434	1.04094e-05	Up-Regulated
MAST1	1.73513	1.04094e-05	Up-Regulated
CRIP1	1.26695	1.15389e-05	Up-Regulated
GPR65	1.60127	1.21827e-05	Up-Regulated
PLA2G7	1.33951	1.31156e-05	Up-Regulated
QPCT	1.67711	1.31914e-05	Up-Regulated
HLA-DRB6	1.31376	1.38452e-05	Up-Regulated
NREP	1.157	1.62628e-05	Up-Regulated
APOL1	1.27206	1.62628e-05	Up-Regulated
BSCL2	1.24927	1.68637e-05	Up-Regulated
CFB	1.10039	1.82791e-05	Up-Regulated
AOAH	1.48793	1.8656e-05	Up-Regulated
GNLY	1.41923	1.94185e-05	Up-Regulated
GPR171	1.69453	1.94185e-05	Up-Regulated
TNFRSF4	1.10809	1.96545e-05	Up-Regulated
CA2	1.68403	2.00172e-05	Up-Regulated
SELL	1.62587	2.21205e-05	Up-Regulated
MYBL1	1.29351	2.3088e-05	Up-Regulated
APOBEC3F	1.3182	2.85331e-05	Up-Regulated
APLNR	1.54341	3.01341e-05	Up-Regulated
LTB	1.59347	3.28076e-05	Up-Regulated
CCDC88C	1.51351	3.45242e-05	Up-Regulated
CXCR3	1.07939	3.78342e-05	Up-Regulated
BATF	1.01209	3.89256e-05	Up-Regulated
MMP3	2.15545	3.89437e-05	Up-Regulated
SDC3	1.33	3.89437e-05	Up-Regulated
PCLAF	1.04532	5.04278e-05	Up-Regulated
CEMIP	1.53762	5.09136e-05	Up-Regulated
FOXM1	1.1969	5.17549e-05	Up-Regulated
CYBB	1.10637	5.33813e-05	Up-Regulated
CAMTA1	1.23328	5.62563e-05	Up-Regulated
LY9	1.33088	6.72921e-05	Up-Regulated
TFEC	1.00001	6.84298e-05	Up-Regulated
CD3G	1.3226	7.2638e-05	Up-Regulated
KLRK1	1.01256	7.53184e-05	Up-Regulated
ARHGAP4	1.00139	8.2482e-05	Up-Regulated
SERPINA1	1.19496	8.63302e-05	Up-Regulated
SPP1	1.64899	9.08742e-05	Up-Regulated
CD79B	1.11793	0.000134421	Up-Regulated
ROR2	1.01815	0.000136748	Up-Regulated
ST8SIA4	1.15663	0.000147111	Up-Regulated
TK1	1.17317	0.000152797	Up-Regulated
ADGRE2	1.20767	0.000155213	Up-Regulated
CX3CR1	1.33386	0.000164513	Up-Regulated
MELK	1.09816	0.00018434	Up-Regulated
P2RY10	1.29756	0.000192153	Up-Regulated
ITGAX	1.32548	0.000214225	Up-Regulated
TCL1A	1.03711	0.000247963	Up-Regulated
PDK1	1.21395	0.000252977	Up-Regulated
CCL19	1.8383	0.000258811	Up-Regulated
APBA2	1.09649	0.000262755	Up-Regulated
CD7	1.17554	0.000291802	Up-Regulated
BARD1	1.2563	0.000322582	Up-Regulated
BCL2A1	1.44919	0.000327617	Up-Regulated
IFIT1	1.01849	0.000413012	Up-Regulated
FCN1	1.2872	0.000459406	Up-Regulated
GPR18	1.54705	0.000534198	Up-Regulated
CD40LG	1.2035	0.000591648	Up-Regulated
RAD51AP1	1.03101	0.000605195	Up-Regulated
S100A9	1.30683	0.000612301	Up-Regulated
CFP	1.2287	0.00062342	Up-Regulated
SCN9A	1.31922	0.000666143	Up-Regulated
FGF9	1.13371	0.000668382	Up-Regulated
TENM4	1.04158	0.000668382	Up-Regulated
CD24	1.00234	0.000683904	Up-Regulated
TDO2	1.06147	0.00071532	Up-Regulated
CTSW	1.02025	0.00119141	Up-Regulated
LAG3	1.18267	0.00123916	Up-Regulated
CXCL5	1.19919	0.00127738	Up-Regulated
TMEM158	1.32219	0.00139244	Up-Regulated
ADAM8	1.03008	0.00150964	Up-Regulated
FYB1	1.07259	0.00161161	Up-Regulated
KNTC1	1.09303	0.00168781	Up-Regulated
CYP27A1	1.1414	0.00173771	Up-Regulated
MMP9	1.36713	0.00185357	Up-Regulated
FMO1	1.03955	0.00236088	Up-Regulated
XIST	1.71544	0.00259088	Up-Regulated
CR2	1.15942	0.00275103	Up-Regulated
CDH13	1.02519	0.00393432	Up-Regulated
CD96	1.01153	0.00643964	Up-Regulated
EZH2	1.03363	0.00951889	Up-Regulated
VNN2	1.33487	0.0138018	Up-Regulated
HLA-DQA1	1.60344	0.0268133	Up-Regulated
CXCL1	1.0276	0.0418123	Up-Regulated
GABARAPL1	-1.41285	4.43201e-14	Down-Regulated
PLPP3	-1.54917	4.80335e-12	Down-Regulated
NFIL3	-2.15125	6.04074e-12	Down-Regulated
IL1R1	-1.45079	9.75493e-12	Down-Regulated
EGFR	-1.2044	1.66869e-11	Down-Regulated
GPX3	-1.57755	8.50944e-11	Down-Regulated
GADD45B	-1.89082	8.67233e-11	Down-Regulated
FOSL2	-1.45819	1.17824e-10	Down-Regulated
KLF9	-1.58108	1.32025e-10	Down-Regulated
EDNRB	-1.5092	2.3325e-10	Down-Regulated
BCL6	-1.20954	3.4162e-10	Down-Regulated
RHOB	-1.40093	3.43203e-10	Down-Regulated
DDR2	-1.17134	5.12148e-10	Down-Regulated
CCN1	-1.83705	1.01882e-09	Down-Regulated
CDKN1A	-1.5072	1.29475e-09	Down-Regulated
HES1	-1.284	1.84543e-09	Down-Regulated
ZBTB16	-3.00918	2.22445e-09	Down-Regulated
JUNB	-1.68036	2.5427e-09	Down-Regulated
APOD	-3.42442	3.99203e-09	Down-Regulated
EGR1	-1.83994	3.99203e-09	Down-Regulated
MYC	-1.5122	6.11583e-09	Down-Regulated
CEBPD	-1.22204	6.78355e-09	Down-Regulated
FKBP5	-3.64363	6.82267e-09	Down-Regulated
SFRP1	-1.44669	6.91566e-09	Down-Regulated
ZFP36	-1.42871	7.3746e-09	Down-Regulated
NOVA1	-1.6844	8.2191e-09	Down-Regulated
TNS2	-1.43683	9.63542e-09	Down-Regulated
PPP1R15A	-1.57272	1.14559e-08	Down-Regulated
ABTB2	-1.23172	1.19871e-08	Down-Regulated
KLF4	-1.45463	1.24209e-08	Down-Regulated
SOCS3	-1.55133	1.25514e-08	Down-Regulated
WASF3	-1.40771	1.57512e-08	Down-Regulated
ANGPTL7	-3.67756	1.8607e-08	Down-Regulated
AKR1B10	-2.18664	2.17642e-08	Down-Regulated
ADM	-1.80905	2.20181e-08	Down-Regulated
MAFF	-1.78056	2.62136e-08	Down-Regulated
MAOA	-2.42288	2.9231e-08	Down-Regulated
KCNK3	-1.5073	2.9231e-08	Down-Regulated
JUN	-1.47542	3.0108e-08	Down-Regulated
NTRK2	-1.11897	3.27591e-08	Down-Regulated
PNRC1	-1.00959	3.27591e-08	Down-Regulated
CDC42EP4	-1.11925	3.52803e-08	Down-Regulated
FAH	-1.16822	4.45337e-08	Down-Regulated
GSN	-1.08504	4.52328e-08	Down-Regulated
TIPARP	-1.17623	6.59195e-08	Down-Regulated
SERPINA3	-1.81529	9.05493e-08	Down-Regulated
FOXO3	-1.05752	1.05897e-07	Down-Regulated
FSTL3	-1.2101	1.18961e-07	Down-Regulated
SLC19A2	-1.67817	1.30119e-07	Down-Regulated
IER2	-1.35108	1.31073e-07	Down-Regulated
NFIC	-1.10845	1.52264e-07	Down-Regulated
LAMA2	-2.08737	1.67772e-07	Down-Regulated
ATF3	-1.84066	1.97933e-07	Down-Regulated
VEGFD	-1.82148	2.00216e-07	Down-Regulated
C7	-2.50373	2.12195e-07	Down-Regulated
PER1	-1.27154	2.16684e-07	Down-Regulated
NPAS2	-1.06652	2.26663e-07	Down-Regulated
GDF15	-2.13245	2.27084e-07	Down-Regulated
SPRY2	-1.31226	2.88271e-07	Down-Regulated
PCDH9	-1.25695	3.65761e-07	Down-Regulated
NR4A1	-1.59789	3.86275e-07	Down-Regulated
DUSP8	-1.1035	4.20048e-07	Down-Regulated
DYRK3	-1.13746	4.48984e-07	Down-Regulated
SLC16A7	-1.23122	5.37003e-07	Down-Regulated
SDC4	-1.21205	6.00908e-07	Down-Regulated
FASN	-1.49546	7.13289e-07	Down-Regulated
ADCY2	-1.19266	7.37643e-07	Down-Regulated
PNPLA2	-1.20717	7.37643e-07	Down-Regulated
DIO3	-1.61369	7.42859e-07	Down-Regulated
TIMP4	-2.23669	7.48639e-07	Down-Regulated
AASS	-1.19345	7.48639e-07	Down-Regulated
FOSB	-3.79499	7.65315e-07	Down-Regulated
PCK1	-4.00479	9.55383e-07	Down-Regulated
MT1X	-1.20359	1.06583e-06	Down-Regulated
TMOD1	-1.16127	1.16171e-06	Down-Regulated
NDRG2	-1.01397	1.16171e-06	Down-Regulated
FOXC1	-1.15615	1.16748e-06	Down-Regulated
LTBP4	-1.21903	1.16748e-06	Down-Regulated
RHOBTB3	-1.04377	1.24737e-06	Down-Regulated
TGFBR3	-1.28145	1.35138e-06	Down-Regulated
ACACB	-1.51566	1.35836e-06	Down-Regulated
C6	-1.70679	1.37574e-06	Down-Regulated
RND1	-1.24881	1.55215e-06	Down-Regulated
NR4A2	-2.07734	2.03604e-06	Down-Regulated
ABCA8	-1.80792	2.09084e-06	Down-Regulated
PNMT	-1.29097	2.34817e-06	Down-Regulated
CFD	-1.10141	2.41935e-06	Down-Regulated
FABP4	-2.53165	2.61823e-06	Down-Regulated
FMO2	-1.27909	2.84219e-06	Down-Regulated
MAP1B	-1.0044	2.8462e-06	Down-Regulated
GADD45A	-1.38781	3.60615e-06	Down-Regulated
HBEGF	-1.62581	3.85027e-06	Down-Regulated
PPARG	-1.09265	5.01867e-06	Down-Regulated
HAS1	-1.8006	5.10222e-06	Down-Regulated
AGTR1	-1.43824	5.35557e-06	Down-Regulated
ADH1B	-3.1306	7.33134e-06	Down-Regulated
ADH1C	-2.46537	8.21473e-06	Down-Regulated
IRS2	-1.04375	8.34696e-06	Down-Regulated
LDLR	-1.13098	9.68764e-06	Down-Regulated
HSPB6	-1.18124	9.80628e-06	Down-Regulated
ABLIM1	-1.06164	1.03741e-05	Down-Regulated
ADIRF	-1.36699	1.09747e-05	Down-Regulated
FAM107A	-1.32198	1.25263e-05	Down-Regulated
ENPP1	-1.20937	1.38245e-05	Down-Regulated
ADH1A	-1.54438	1.60997e-05	Down-Regulated
DEPP1	-1.35186	1.65725e-05	Down-Regulated
LMO3	-1.10074	1.81822e-05	Down-Regulated
MYOC	-2.20344	2.07306e-05	Down-Regulated
PLIN1	-3.18485	2.58951e-05	Down-Regulated
IGFBP5	-1.17176	2.60563e-05	Down-Regulated
NEAT1	-1.2785	2.67474e-05	Down-Regulated
AOC3	-1.16	2.72445e-05	Down-Regulated
CRYAB	-1.26485	3.0694e-05	Down-Regulated
PLIN2	-1.04572	3.13847e-05	Down-Regulated
SLPI	-1.14367	3.33603e-05	Down-Regulated
PDE4B	-1.02257	3.38773e-05	Down-Regulated
PTGS2	-1.75695	3.44621e-05	Down-Regulated
SVEP1	-1.00529	3.55712e-05	Down-Regulated
CCL25	-1.14632	3.88132e-05	Down-Regulated
WASL	-1.15579	4.45492e-05	Down-Regulated
INHBB	-1.06604	4.57881e-05	Down-Regulated
FBXW4P1	-1.28666	4.82202e-05	Down-Regulated
CHRDL1	-1.45482	5.3265e-05	Down-Regulated
DDX3Y	-2.79486	5.74888e-05	Down-Regulated
LIPE	-1.37816	6.34073e-05	Down-Regulated
SCD	-1.42147	6.34963e-05	Down-Regulated
LPL	-1.54515	7.76088e-05	Down-Regulated
SEMA3E	-1.81638	7.96694e-05	Down-Regulated
RGS16	-1.30973	8.01829e-05	Down-Regulated
APOB	-1.16467	8.59578e-05	Down-Regulated
RPS4Y1	-3.2677	8.61862e-05	Down-Regulated
ATP1A2	-1.43974	9.40233e-05	Down-Regulated
SERPINA5	-1.65318	0.000115713	Down-Regulated
ITGA7	-1.05314	0.000118911	Down-Regulated
FOS	-1.61117	0.000118916	Down-Regulated
ADIPOQ	-2.77558	0.000126298	Down-Regulated
SIX3	-1.02475	0.000148402	Down-Regulated
SLC6A3	-1.56932	0.000164544	Down-Regulated
PHKA1	-1.24384	0.000188593	Down-Regulated
LMOD1	-1.80609	0.00019251	Down-Regulated
RRAD	-1.3699	0.000206998	Down-Regulated
ELANE	-1.30162	0.000210846	Down-Regulated
SPEG	-1.00492	0.000212501	Down-Regulated
NR4A3	-1.19364	0.00023676	Down-Regulated
RBP4	-1.57121	0.000282167	Down-Regulated
PITX1	-1.57603	0.000294685	Down-Regulated
ARC	-1.53723	0.000352958	Down-Regulated
BMP4	-1.32707	0.000365945	Down-Regulated
LAMA3	-1.4457	0.000365945	Down-Regulated
CDO1	-1.24427	0.000376466	Down-Regulated
ADGRG2	-1.1965	0.000392612	Down-Regulated
MYH11	-1.53705	0.00040662	Down-Regulated
IGFBP6	-1.16873	0.000411588	Down-Regulated
DUSP4	-1.15735	0.000414821	Down-Regulated
VEGFA	-1.01971	0.000448041	Down-Regulated
CYP4B1	-2.88136	0.000467656	Down-Regulated
IL1RL2	-1.22463	0.000505526	Down-Regulated
EREG	-1.46274	0.000514051	Down-Regulated
FOXC2	-1.17	0.000620339	Down-Regulated
IER3	-1.28787	0.000624371	Down-Regulated
CNN1	-1.48786	0.000908539	Down-Regulated
GPRC5A	-1.32223	0.00102411	Down-Regulated
EIF1AY	-1.92405	0.00105324	Down-Regulated
PDK4	-2.02438	0.00122143	Down-Regulated
PLN	-1.21021	0.00125096	Down-Regulated
SOX5	-1.52413	0.00126269	Down-Regulated
NPY1R	-1.45501	0.00133477	Down-Regulated
HP	-1.53638	0.00137338	Down-Regulated
LRCH1	-1.0326	0.00139697	Down-Regulated
CES1	-1.00141	0.00142685	Down-Regulated
FBLN2	-1.10889	0.00154342	Down-Regulated
GPD1	-1.8997	0.00154968	Down-Regulated
C1orf21	-1.16896	0.00158317	Down-Regulated
PRG2	-1.05493	0.00175009	Down-Regulated
PC	-1.03831	0.00191275	Down-Regulated
COBL	-1.14118	0.00216921	Down-Regulated
BTC	-1.36353	0.00229742	Down-Regulated
MPP6	-1.41839	0.0023929	Down-Regulated
ACADL	-1.1777	0.00262183	Down-Regulated
WNT11	-1.16653	0.00280633	Down-Regulated
PLS1	-1.10998	0.00300964	Down-Regulated
CXCL2	-1.28663	0.00318148	Down-Regulated
CRLF1	-1.24531	0.00318821	Down-Regulated
LIF	-1.43757	0.00319887	Down-Regulated
CLUL1	-1.08617	0.00358478	Down-Regulated
AREG	-1.08452	0.00387368	Down-Regulated
USP9Y	-1.62799	0.00442151	Down-Regulated
LEP	-1.81049	0.00489549	Down-Regulated
PENK	-1.05675	0.00726811	Down-Regulated
G0S2	-1.0166	0.00737427	Down-Regulated
ZIC1	-1.40572	0.0075249	Down-Regulated
PTX3	-1.434	0.00850787	Down-Regulated
CDH19	-1.10102	0.0103219	Down-Regulated
EMX2	-1.01205	0.0103857	Down-Regulated
RAMP2	-1.2278	0.0105996	Down-Regulated
CRY2	-1.01218	0.0108192	Down-Regulated
TXLNGY	-1.24229	0.0109668	Down-Regulated
NLGN4Y	-1.36285	0.0113313	Down-Regulated
CASQ2	-1.14389	0.011471	Down-Regulated
WIF1	-1.19058	0.0180911	Down-Regulated
IL6	-1.21713	0.0250775	Down-Regulated
KDM5D	-1.25135	0.0392998	Down-Regulated
